# Supplementary material for: Mitochondria mediate cell membrane repair and contribute to Duchenne muscular dystrophy
Source: PubMed Central journal article supplement — Cell Death Differ. 2016 Nov 11;24(2):330–42. doi: 10.1038/cdd.2016.127 (PMC5299714; doi:10.1038/cdd.2016.127), 2016-11-11
Supplement: cdd2016127x1.pdf [file cdd2016127x1.pdf]

## Supplementary Materials

a

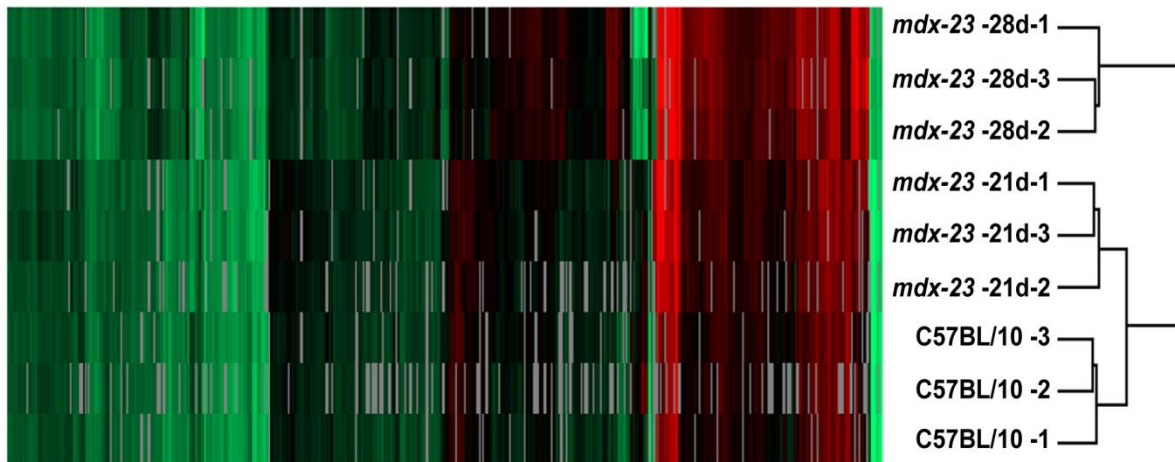

b

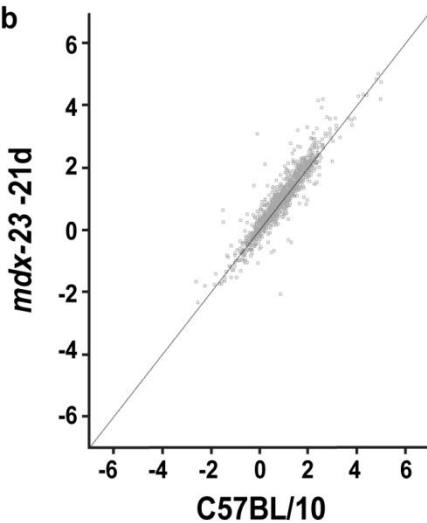

c

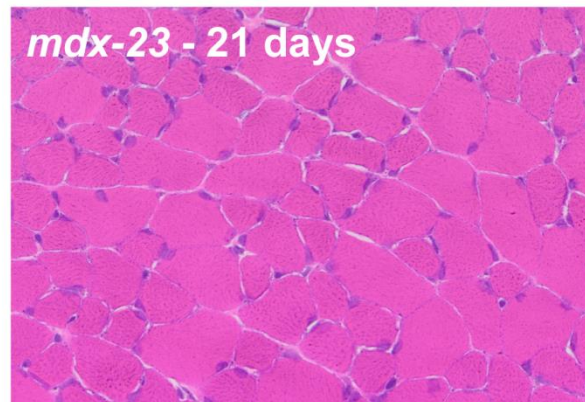

### Supplemental Figure 1: Analysis of protein changes at disease onset in *mdx* mice. (a)

Hierarchical cluster analysis of the 1138 proteins identified in *mdx*-23 at 21 and 28 days of age and the parental WT strain (C57BL/10). (b) Pearson correlation analysis of proteins at 21 days of age *mdx*-23 and parental WT strain. (c) Images showing histological features of gastrocnemius muscle cross-sections from 21 day old *mdx*-23. Note the absence of small, centrally nucleated, regenerating fibers in the muscles at 21 days.

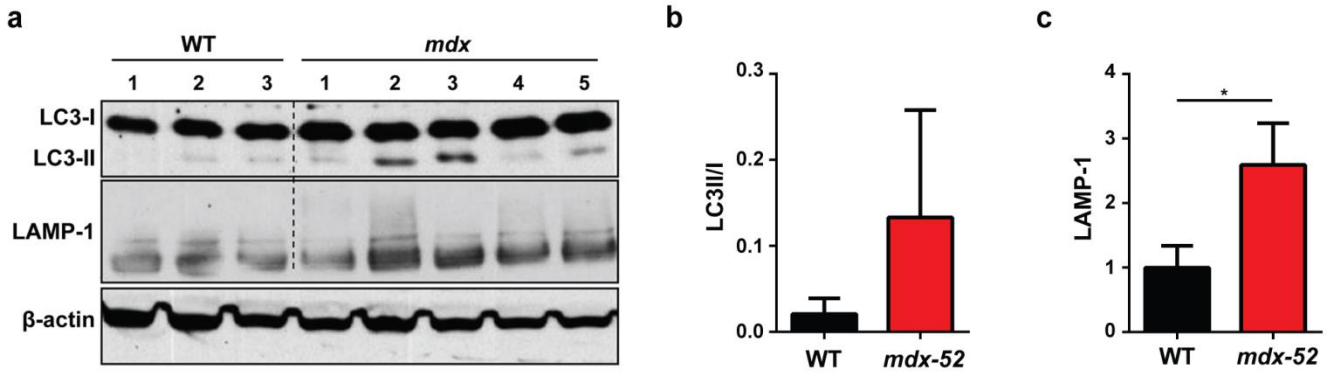

**Supplemental Figure 2: (a)** Western Blot analysis of *mdx-52* proteins at 28 days of age from five independent mice. **(b)** Densitometric analysis of LC3I and LC3II. Graph shows LC3II-to-LC3I ratio. **(c)** Densitometric analysis of LAMP-1 (normalized to the loading control –  $\beta$ -actin). (\*)  $p \leq 0.05$  by Student's *t* test.

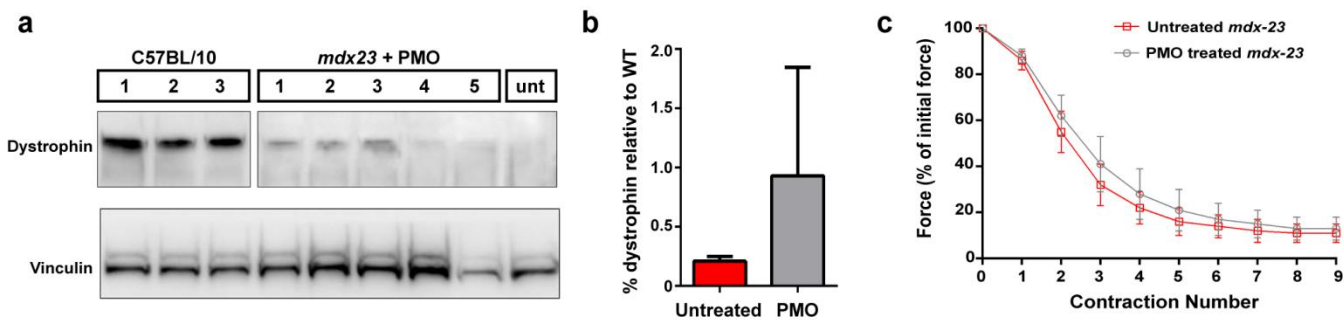

**Supplemental Figure 3: Effect of exon skipping on *mdx* sarcolemmal repair. (a)** Western Blot of dystrophin protein from EDL of five *mdx-23* animals one month after one systemic (intravenous) injection of PMO. **(b)** Dystrophin level was quantified by normalizing the protein levels to loading control and presented as a percentage of the total WT dystrophin level. **(c)** Analysis of loss in EDL muscle contractile force following 10% LC-injuries.

**Supplemental Table 2: Mitochondrial proteins with altered expression in 28 days old *mdx* muscle**

| Entry  | Entry name                                                                                                             |
|--------|------------------------------------------------------------------------------------------------------------------------|
| O35459 | Delta(3,5)-Delta(2,4)-dienoyl-CoA isomerase, mitochondrial                                                             |
| Q9CPQ1 | Cytochrome c oxidase subunit 6C                                                                                        |
| P56392 | Cytochrome c oxidase subunit 7A1, mitochondrial                                                                        |
| P43023 | Cytochrome c oxidase subunit 6A2, mitochondrial                                                                        |
| P51174 | Long-chain specific acyl-CoA dehydrogenase, mitochondrial                                                              |
| P19536 | Cytochrome c oxidase subunit 5B, mitochondrial                                                                         |
| Q8BMF4 | Dihydrolipoyllysine-residue acetyltransferase component of pyruvate dehydrogenase complex, mitochondrial (EC 2.3.1.12) |
| Q9CZU6 | Citrate synthase, mitochondrial                                                                                        |
| P19783 | Cytochrome c oxidase subunit 4 isoform 1, mitochondrial                                                                |
| P56391 | Cytochrome c oxidase subunit 6B1                                                                                       |
| Q9EQ20 | Methylmalonate-semialdehyde dehydrogenase [acylating]                                                                  |
| Q64521 | Glycerol-3-phosphate dehydrogenase, mitochondrial                                                                      |
| P45952 | Medium-chain specific acyl-CoA dehydrogenase, mitochondrial                                                            |
| Q8BH59 | Calcium-binding mitochondrial carrier protein Aralar1                                                                  |
| Q8K1Z0 | Ubiquinone biosynthesis protein COQ9, mitochondrial                                                                    |
| Q06185 | ATP synthase subunit e, mitochondrial (ATPase subunit e)                                                               |
| Q9DCW4 | Electron transfer flavoprotein subunit beta (Beta-ETF)                                                                 |
| Q9DB20 | ATP synthase subunit O, mitochondrial                                                                                  |
| Q9CQX8 | 28S ribosomal protein S36, mitochondrial                                                                               |
| Q91WD5 | NADH dehydrogenase [ubiquinone] iron-sulfur protein 2, mitochondrial                                                   |
| P70404 | Isocitrate dehydrogenase [NAD] subunit gamma 1, mitochondrial                                                          |
| P50544 | Very long-chain specific acyl-CoA dehydrogenase, mitochondrial                                                         |
| Q9WTP6 | Adenylate kinase 2, mitochondrial (AK 2)                                                                               |
| Q8BK30 | NADH dehydrogenase [ubiquinone] flavoprotein 3, mitochondrial (Complex I-9kD)                                          |
| Q6P8J7 | Creatine kinase S-type, mitochondrial                                                                                  |
| P99029 | Peroxiredoxin-5, mitochondrial                                                                                         |
| Q91VR2 | ATP synthase subunit gamma, mitochondrial (F-ATPase gamma subunit)                                                     |
| P47791 | Glutathione reductase, mitochondrial (GR)                                                                              |
| Q91WS0 | CDGSH iron-sulfur domain-containing protein 1 (MitoNEET)                                                               |
| Q9D0K2 | Succinyl-CoA:3-ketoacid coenzyme A transferase 1, mitochondrial                                                        |

Mitochondrial proteins whose level was significantly altered in 28 days old *mdx* mice compared to the age-matched control are listed such that black font represent proteins with lower expression in *mdx23* mice. The proteins listed in black font showed reduced level, while those in white font showed increased expression.
